# Supplementary material for: Detecting Leakages in the PneumaticSystem of Heavy Vehicles : Modelling Using Simulink
Source: MDPI journal article supplement (doi:10.3390/s24092844), 2010-01-01
Supplement: s1 [file s1]

# Adaptive Fabrication of Electrochemical Chips with a Paste-Dispensing 3D Printer

Ten It Wong <sup>1,†</sup>, Candy Ng <sup>2,†,‡</sup>, Shengxuan Lin <sup>3,‡</sup>, Zhong Chen <sup>2</sup> and Xiaodong Zhou <sup>1,\*</sup>

<sup>1</sup> Institute of Materials Research and Engineering, A\*STAR (Agency for Science, Technology and Research), 2 Fusionopolis Way, #08-03, Innovis, Singapore 138634, Singapore; wongti@imre.a-star.edu.sg

<sup>2</sup> School of Materials Science & Engineering, Nanyang Technological University, Block N4.1, Nanyang Avenue, Singapore 639798, Singapore; candying107@gmail.com (C.N.); aszchen@ntu.edu.sg (Z.C.)

<sup>3</sup> Residues and Resource Reclamation Centre (R3C), Nanyang Environment and Water Research Institute, Nanyang Technological University, 1 Cleantech Loop, Clean Tech One, Singapore 637141, Singapore; lin.shengxuan@gmail.com

\* Correspondence: donna-zhou@imre.a-star.edu.sg

† These authors contributed equally to this work.

‡ The authors were with the indicated affiliation during the conduction of experiments in this work.

## List of Figures

|    |                                                                                                                                                                    |    |
|----|--------------------------------------------------------------------------------------------------------------------------------------------------------------------|----|
| S1 | Filling of carbon paste into the syringe barrel. . . . .                                                                                                           | s2 |
| S2 | Photo of the fabricated electrodes with (a) double-sided stickers and (b) grey dielectric paste as the insulating layer.. . . .                                    | s2 |
| S3 | (a) Schematic diagram of additional movement added into the G-code for removing the whiskers. (b) G-code before and after the addition of extra movements. . . . . | s4 |
| S4 | The cleaning step added to remove the excessive paste accumulated on the print head. . . . .                                                                       | s5 |
| S5 | Recorded cyclic voltammogram of commercial carbon chip using 10 mM K <sub>3</sub> Fe(CN) <sub>6</sub> in 1.0 M KCl solution. . . . .                               | s5 |
| S6 | Voltammograms of ASV tests with baseline deducted for Pb(II) and Cd(II) in 0.1 M acetate buffer solution with pH = 4.5. . . . .                                    | s6 |

## List of Tables

|    |                                                                                 |    |
|----|---------------------------------------------------------------------------------|----|
| S1 | Engineering problems encountered and solved during the 3D printing of EC chips. | s3 |
|----|---------------------------------------------------------------------------------|----|

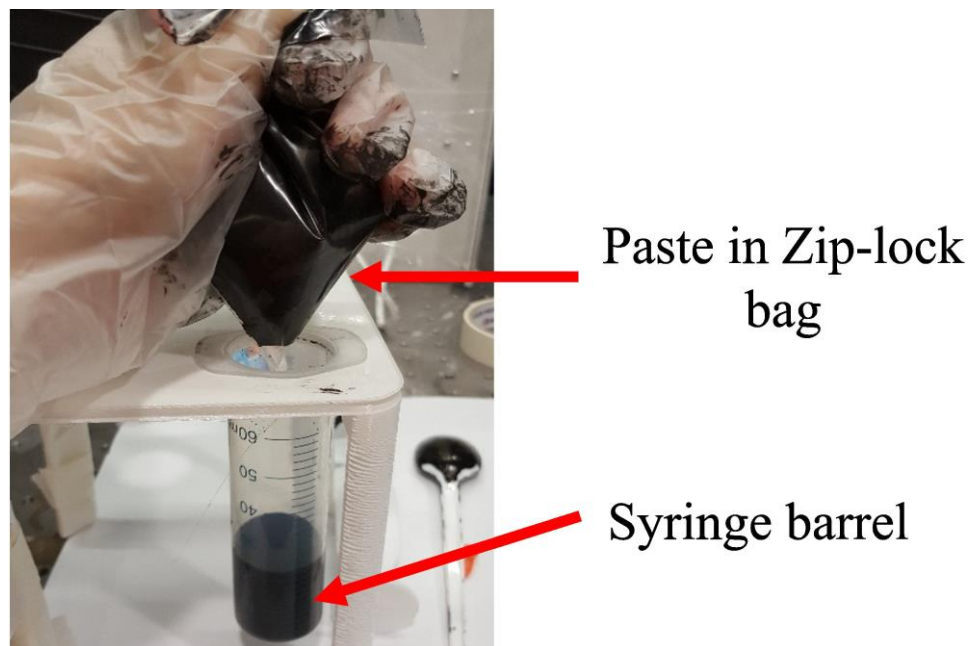

**Figure S1.** The filling of carbon paste into the syringe barrel. To avoid bubbles, the paste is squeezed into the syringe barrel through a 2 mm diameter small hole cut on the corner of a zip-lock bag.

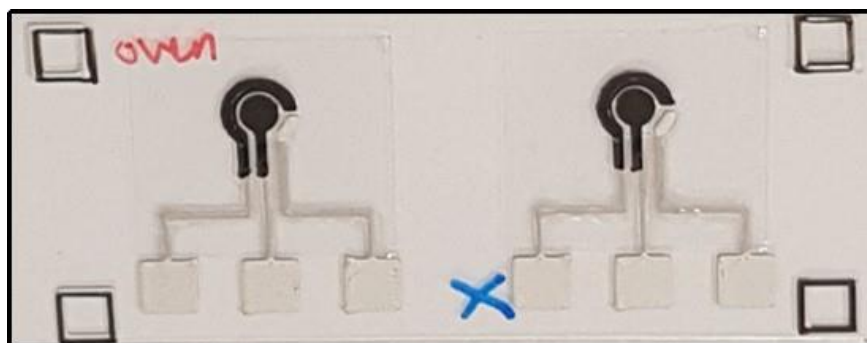

(a)

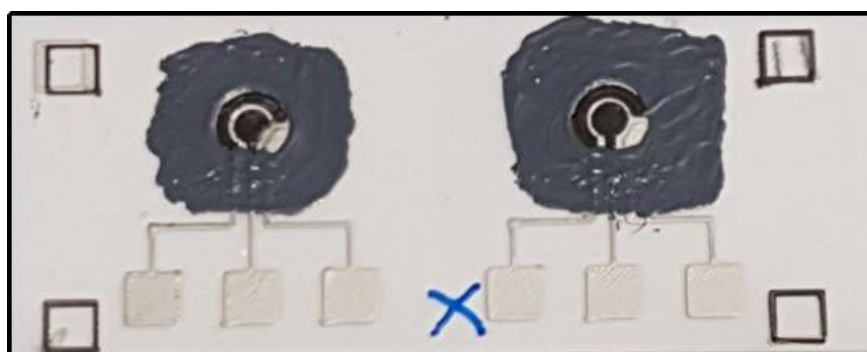

(b)

**Figure S2.** Photo of the fabricated electrodes with a) double-sided stickers and b) grey dielectric paste as the insulating layer.

**Table S1.** Engineering problems encountered and solved during the 3D printing of EC chips.

| Issues                                                                  | Solutions                                                                                                                                                            | Examples                                                                             |
|-------------------------------------------------------------------------|----------------------------------------------------------------------------------------------------------------------------------------------------------------------|--------------------------------------------------------------------------------------|
| Poor levelling caused scratching on the substrate or disconnected lines | Carefully aligned, and the gap between the nozzle and the PMMA substrate was set to 0.1 mm                                                                           | 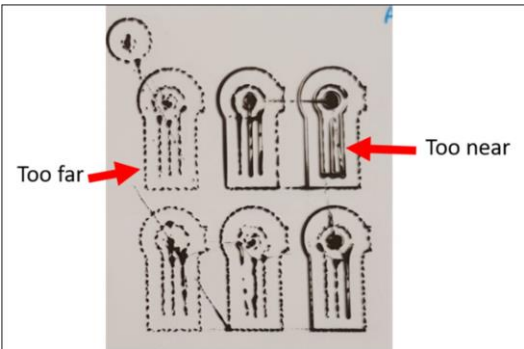   |
| Bulge of the tube with pressure accumulation                            | <ol style="list-style-type: none"> <li>1. Replace the polyethylene tube with a PTFE tube</li> <li>2. Clean thoroughly and seal tightly for reused needles</li> </ol> |   |
| Whiskers on the printed chip                                            | The nozzle was first moved up, held the paste extrusion, and then pulled down to print (Figure S3)                                                                   |  |
| Inaccurate printing dimension due to an excessive amount of paste       | Moved to a sponge to remove the accumulated paste at the needle tip (Figure S4)                                                                                      |  |

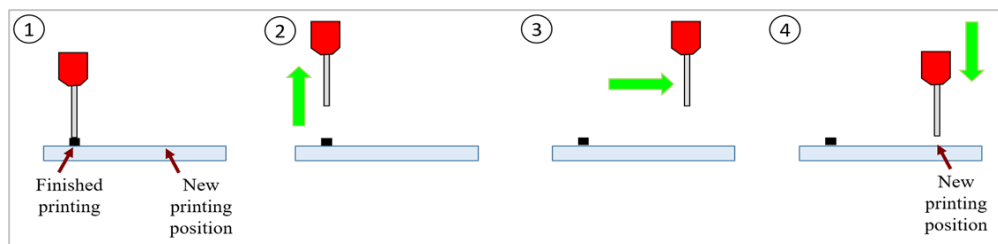

(a)

|        |                                         |                                            |
|--------|-----------------------------------------|--------------------------------------------|
| Before | G0 F6000 X65.375 Y84.625                |                                            |
|        | G1 F300 X65.375 Y90.375 E0.11183        |                                            |
|        | G1 X59.625 Y90.375 E0.13437             |                                            |
|        | <del>G1 X59.625 Y84.625 E0.15690</del>  |                                            |
|        | G1 X65.375 Y84.625 E0.17943             | ;finish printing (original)                |
|        | G1 F10800 E-4.32057                     |                                            |
|        | G0 F6000 X80.125 Y103.765               | ;move to new printing position (original)  |
|        | G1 F10800 E0.17943                      |                                            |
|        | G1 F300 X80.875 Y103.765 E0.18237       | ;start printing at new position (original) |
|        | G1 X80.875 Y108.238 E0.19990            |                                            |
|        | G1 X80.632 Y108.432 E0.20112            |                                            |
|        | G1 X80.369 Y108.707 E0.20261            |                                            |
|        | G1 X80.146 Y109.016 E0.20411            |                                            |
| After  | G0 F6000 X65.375 Y84.625                |                                            |
|        | G1 F300 X65.375 Y90.375 E0.11183        |                                            |
|        | G1 X59.625 Y90.375 E0.13437             |                                            |
|        | <del>G1 X59.625 Y84.625 E0.15690</del>  |                                            |
|        | G1 X65.375 Y84.625 E0.17943             | ;finish printing (original)                |
|        | G0 F6000 Z20.0                          | ;move up (added)                           |
|        | G1 F10800 E-4.32057                     |                                            |
|        | G0 F6000 X80.125 Y103.765               | ;move to new printing position (original)  |
|        | G1 F10800 E0.17943                      |                                            |
|        | G0 F10000 Z1.120                        | ;move down (added)                         |
|        | G1 F300 X80.875 Y103.765 E0.18237       | ;start printing at new position (original) |
|        | <del>G1 X80.875 Y108.238 E0.19990</del> |                                            |
|        | G1 X80.632 Y108.432 E0.20112            |                                            |
|        | G1 X80.369 Y108.707 E0.20261            |                                            |
|        | G1 X80.146 Y109.016 E0.20411            |                                            |
|        | <del>G1 X79.967 Y109.351 E0.20559</del> |                                            |

(b)

**Figure S3.** (a) Schematic diagram of additional movement added into the G-code for removing the whiskers. (b) G-code before and after the addition of extra movements.

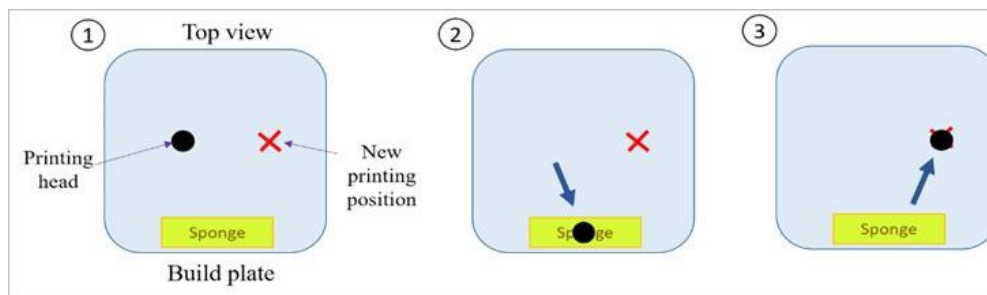

(a)

|        |                                   |                                            |
|--------|-----------------------------------|--------------------------------------------|
| Before | G1 X59.625 Y90.375 E0.13437       |                                            |
|        | G1 X59.625 Y84.625 E0.15690       |                                            |
|        | G1 X65.375 Y84.625 E0.17943       | ;finish printing (original)                |
|        | G0 F6000 Z20.0                    | ;move up (added)                           |
|        | G1 F10800 E-4.32057               |                                            |
|        | G0 F6000 X80.125 Y103.765         | ;move to new printing position (original)  |
|        | G1 F10800 E0.17943                |                                            |
|        | G0 F10000 Z1.120                  | ;move down (added)                         |
|        | G1 F300 X80.875 Y103.765 E0.18237 | ;start printing at new position (original) |
|        | G1 X80.875 Y108.238 E0.19990      |                                            |
| After  | G1 X80.632 Y108.432 E0.20112      |                                            |
|        | G1 X59.625 Y84.625 E0.15690       |                                            |
|        | G1 X65.375 Y84.625 E0.17943       | ;finish printing (original)                |
|        | G0 F6000 Z20.0                    | ;move up (added)                           |
|        | G1 F10800 E-4.32057               |                                            |
|        | G0 F6000 Y60                      | ;move to the side (cleaning)               |
|        | G1 F10800 E0.17943                |                                            |
|        | G0 F6000 Z14.9                    | ;move down and touch the sponge (cleaning) |
|        | G0 F6000 X75.0                    | ;move right (cleaning)                     |
|        | G0 F6000 X60.0                    | ;move left (cleaning)                      |
|        | G0 F6000 X75.0                    | ;move right (cleaning)                     |
|        | G0 F6000 X80.125 Y103.765         | ;move to new printing position (original)  |
|        | G0 F10000 Z1.120                  | ;move down (added)                         |
|        | G1 F300 X80.875 Y103.765 E0.18237 | ;start printing at new position (original) |
|        | G1 X80.875 Y108.238 E0.19990      |                                            |
|        | G1 X80.632 Y108.432 E0.20112      |                                            |
|        |                                   |                                            |
|        |                                   |                                            |
|        |                                   |                                            |
|        |                                   |                                            |

(b)

**Figure S4.** The cleaning step added to remove the excessive paste accumulated on the print head: (a) the cleaning step added and (b) the modification of the G-code.

### Cyclic Voltammogram of Commercial chip

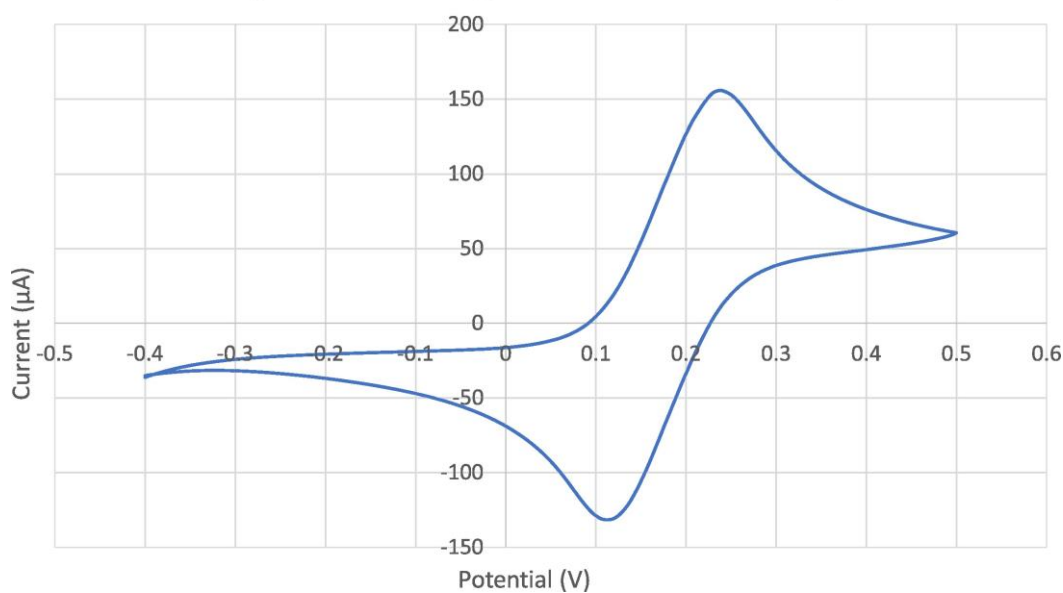

**Figure S5.** Recorded cyclic voltammogram of a commercial carbon chip using 10 mM  $K_3Fe(CN)_6$  in 1.0 MKCl solution.

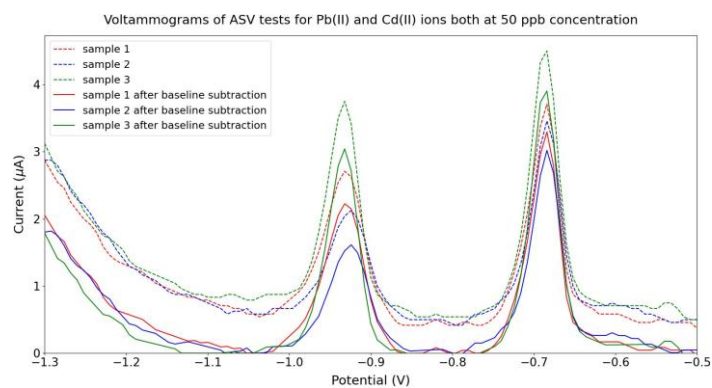

(a)

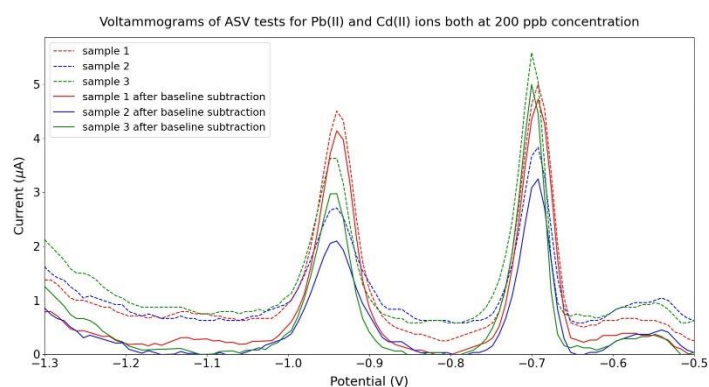

(b)

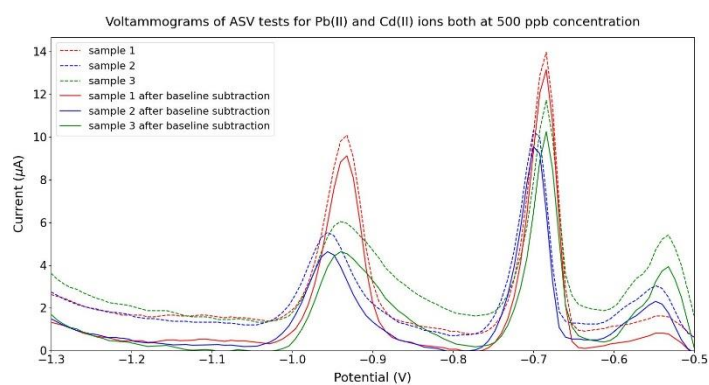

(c)

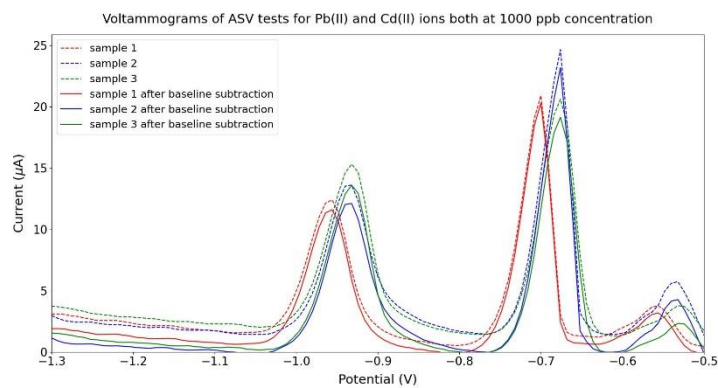

(d)

**Figure S6.** Voltammograms of ASV tests with the baseline deducted for Pb(II) and Cd(II) in 0.1 M acetate buffer solution with pH = 4.5, at the concentrations of (a) 50 ppb, (b) 200 ppb, (c) 500 ppb, and (d) 1000 ppb for both ions.
